# Supplementary material for: Blood glucose variance measured by continuous glucose monitors across the menstrual cycle
Source: PubMed Central journal article supplement (PMC10421863; doi:10.1038/s41746-023-00884-x), 2023-08-11
Supplement: 41746_2023_884_MOESM1_ESM.pdf [file 41746_2023_884_MOESM1_ESM.pdf]

## Supplementary Information

|                                        | F      | $\chi^2$ | df | p-value |
|----------------------------------------|--------|----------|----|---------|
| <b>Physiological Signals</b>           |        |          |    |         |
| Blood Glucose (mmol/L)                 | 20.20  |          | 3  | <0.001  |
| Luteinizing Hormone (mIU/mL)           | 181.00 |          | 3  | <0.001  |
| Estrogen (ng/mL)                       | 86.80  |          | 3  | <0.001  |
| Step Count                             | 4.57   |          | 3  | <0.01   |
| <b>Demographics</b>                    |        |          |    |         |
| Age (yrs)                              | 2.31   |          | 3  | 0.07    |
| Height (cm)                            | 2.24   |          | 3  | 0.08    |
| Weight (kg)                            | 2.38   |          | 3  | 0.07    |
| BMI (kg/m <sup>2</sup> )               | 1.56   |          | 3  | 0.20    |
| <b>Daily Self-reported Experiences</b> |        |          |    |         |
| Appetite                               |        | 5.20     | 12 | 0.82    |
| Exercise Level                         |        | 17.19    | 12 | 0.04    |
| Food Cravings                          |        | 36.47    | 15 | 0.002   |
| Bloating                               |        | 110.39   | 15 | <0.001  |
| Fatigue                                |        | 27.52    | 15 | 0.02    |
| Sleep Issues                           |        | 29.29    | 15 | 0.01    |

**Supplementary Table 1.** Detailed results of the statistical tests conducted for Table 1, including F-statistics and p-values for the ANOVAs and  $\chi^2$  statistics and p-values for the  $\chi^2$  tests.

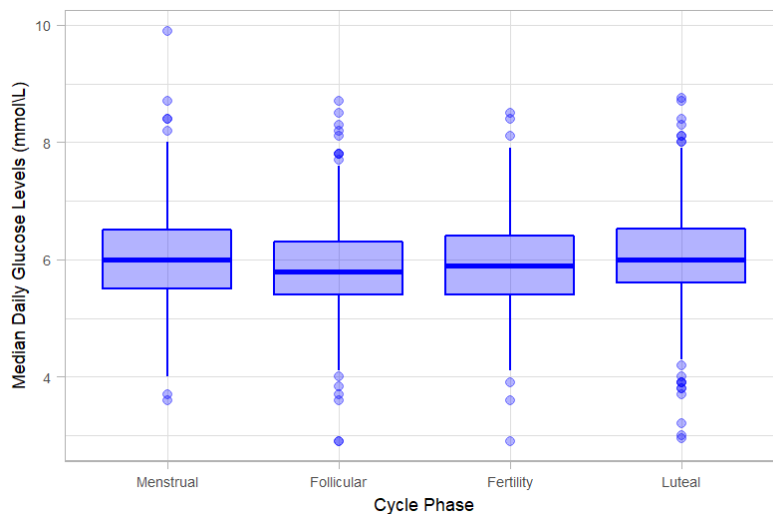

**Supplementary Figure 1.** Variation in raw median daily glucose levels across menstrual cycle phases. The center line represents the median, bounds of box represents the lower (Q1) and upper (Q3) quartiles, while the error bars represent the standard deviation.
